# Supplementary material for: Aircraft surveys for air eDNA: probing biodiversity in the sky
Source: PeerJ. 2023 Apr 14;11:e15171. doi: 10.7717/peerj.15171 (PMC10108859; doi:10.7717/peerj.15171)
Supplement: Supplemental Information 1 [file peerj-11-15171-s001.xlsx]

## Sheet: S2.Table 1
S2.Table 1. Overall statistics of raw preprocessed sequence data from all six research flights as well as the pooled negative control.
Sample IDs S1-S6 correspond to Flights #1-6. NC7 corresponds to the pooled NC sample.
Over 2 million raw reads were processed comprising 1.075 Gb.
Sample ID	# Reads	Yield (Mbases)	Mean Quality Score	% Bases ≥30
S1	239628	120	34.4	86.59
S2	264219	132	34.29	85.96
S3	373721	187	34.48	86.77
S4	336893	168	34.56	87.11
S5	426097	213	34.17	85.61
S6	384368	192	34.5	86.87
Overall:	2024926	1012	34.4	86.485
Pooled Negative Control Statistics:
Sample ID	# Reads	Yield (Mbases)	Mean Quality Score	% Bases ≥30
NC7	125220	63	33.78	84.14
Total Raw Data	# Reads	Yield (Mbases)
	2150146	1075

## Sheet: S2.Table2
S2.Table 2. Summary of reads processed on the mBRAVE platform, including BINS and unassigned OTUs.
BIN: Barcode Identification Number. Seqs: # of sequences in each BIN. OTU Count: Number of remaining OTUs unassigned to BINS of BOLD records.
Run Name	Reads	Post Filter	MeanLength	MeanQV	MeanGC	BINs	Seqs	OTU Count	Reads in Chimeras	Filtered %	Dereplicated %
COI1	79619	28694	203.93bp	40	0.5559	3	54	2752	707	63.96	70.67
COI2	525373	92200	175.79bp	34.53	0.573	5	66	16872	1312	82.45	59.24
COI3	746108	165310	180.12bp	34.95	0.566	3	91	22647	3449	77.84	63.44
COI4	672586	178666	178.44bp	35.2	0.5442	4	36	20830	2004	73.44	69.69
COI5	851314	148705	181.11bp	34.96	0.5514	4	725	18245	1172	82.53	69.9
COI6	767964	163149	181.16bp	34.79	0.5492	5	1311	21953	939	78.76	71.6
ITS1	79635	24437	183.51bp	39.94	0.5572	9	3491	2477	654	69.31	72.59
ITS2	144613	34646	242.37bp	38.84	0.5643	5	11382	2637	1776	76.04	65.87
ITS3	237406	66415	278.34bp	38.11	0.5644	19	23625	3047	6296	72.02	62.28
ITS4	242658	74434	241.32bp	39.17	0.5395	9	39137	3423	3239	69.33	72.06
ITS5	253162	61695	258.71bp	38.66	0.5501	7	26769	2091	1849	75.63	74.71
ITS6	258061	65403	274.87bp	38.15	0.5511	5	25758	2648	1218	74.66	77.86

## Sheet: S2.Table3
S2. Table 3. Reads Identified to BOLD Barcode Identification Number (BIN) on the mBRAVE platform for Vertebrate COI and Plant ITS.
Note: The mBRAVE/BOLD database does not currently support bacterial 16S analyses (only COI).
BIN/Taxon ID	Phylum	Class	Order	Family	Subfamily	Genus	Species BIN	Sequences	Dereplicates †	Preclusters †	Abundance Rank ∗	Dereplication Reduction (%)	Mean Similarity (%)	Mean Overlap	Length	GC Composition
COI1: Flight #1
BOLD:AAA2294	Chordata	Mammalia	Artiodactyla	Bovidae	Bovinae	Bos	Bos sp. BXL006, Bos sp. BXL002, Bos javanicus, Bos taurus, Bos indicus, Bos frontalis, Bos primigenius	49	11	11	1	77.55	99.81	174.92	174.84	45.85
BOLD:ACB3766	Chordata	Mammalia	Artiodactyla	Bovidae	Bovinae	Bos	Bos gaurus, Bos frontalis, Bos javanicus	4	2	2	2	50	90.43	175	175	43.29
BOLD:AAE0841	Chordata	Mammalia	Artiodactyla	Bovidae	Bovinae	Bos, Bubalus	Bos taurus, Bubalus bubalis, Bubalus quarlesi, Bubalus arnee	1	1	1	3	0	91.51	106	175	43.43
COI2: Flight #2
BOLD:AAA2294	Chordata	Mammalia	Artiodactyla	Bovidae	Bovinae	Bos	Bos sp. BXL006, Bos sp. BXL002, Bos javanicus, Bos taurus, Bos indicus, Bos frontalis, Bos primigenius	53	23	23	1	56.6	99.48	175.32	175.51	47.03
BOLD:AAA0001	Chordata	Mammalia	Primates	Hominidae	Homininae	Homo	Homo sapiens, Homo neanderthalensis, Homo heidelbergensis, Homo denisova	2	2	2	2	0	98.92	186	186	45.97
BOLD:AAA3630	Chordata	Aves	Galliformes	Phasianidae		Gallus	Gallus varius, Gallus gallus, Gallus sonneratii	2	2	2	2	0	100	175	175	50.29
BOLD:ACB3766	Chordata	Mammalia	Artiodactyla	Bovidae	Bovinae	Bos	Bos gaurus, Bos frontalis, Bos javanicus	2	2	2	2	0	90.29	175	175	43.43
BOLD:ABU6517	Arthropoda	Insecta	Coleoptera	Scarabaeidae	Scarabaeinae	Dichotomius	Dichotomius mamillatus, Dichotomius satanas	7	3	3	1	57.14	94.64	121.43	119.71	45.35
COI3: Flight #3
BOLD:AAA2294	Chordata	Mammalia	Artiodactyla	Bovidae	Bovinae	Bos	Bos sp. BXL006, Bos sp. BXL002, Bos javanicus, Bos taurus, Bos indicus, Bos frontalis, Bos primigenius	60	24	24	1	60	99.49	174.93	174.93	46.98
BOLD:AAA0001	Chordata	Mammalia	Primates	Hominidae	Homininae	Homo	Homo sapiens, Homo neanderthalensis, Homo heidelbergensis, Homo denisova	21	20	20	2	4.76	98.31	185.95	185.95	44.99
BOLD:AAA3630	Chordata	Aves	Galliformes	Phasianidae		Gallus	Gallus varius, Gallus gallus, Gallus sonneratii	10	3	3	3	70	99.71	173	173	50.17
COI4: Flight #4
BOLD:AAA2294	Chordata	Mammalia	Artiodactyla	Bovidae	Bovinae	Bos	Bos sp. BXL006, Bos sp. BXL002, Bos javanicus, Bos taurus, Bos indicus, Bos frontalis, Bos primigenius	27	15	15	1	44.44	99.32	174.78	174.78	47.07
BOLD:AAA3630	Chordata	Aves	Galliformes	Phasianidae		Gallus	Gallus varius, Gallus gallus, Gallus sonneratii	6	6	6	2	0	99.23	173	173	50.19
BOLD:AAA0001	Chordata	Mammalia	Primates	Hominidae	Homininae	Homo	Homo sapiens, Homo neanderthalensis, Homo heidelbergensis, Homo denisova	2	2	2	3	0	99.19	186	186	45.7
BOLD:ACB3766	Chordata	Mammalia	Artiodactyla	Bovidae	Bovinae	Bos	Bos gaurus, Bos frontalis, Bos javanicus	1	1	1	4	0	91.43	175	175	45.71
COI5: Flight #5
BOLD:AAA0001	Chordata	Mammalia	Primates	Hominidae	Homininae	Homo	Homo sapiens, Homo neanderthalensis, Homo heidelbergensis, Homo denisova	535	210	210	1	60.75	98.82	185.98	185.98	45.51
BOLD:AAA2294	Chordata	Mammalia	Artiodactyla	Bovidae	Bovinae	Bos	Bos sp. BXL006, Bos sp. BXL002, Bos javanicus, Bos taurus, Bos indicus, Bos frontalis, Bos primigenius	188	93	93	2	50.53	98.78	174.11	174.11	46.36
BOLD:ACZ0957	Arthropoda	Insecta	Coleoptera	Leiodidae	Cholevinae	Ptomaphagus	Ptomaphagus sericatus	1	1	1	1	0	92.31	130	130	57.69
BOLD:ACG0833	Arthropoda	Insecta	Odonata	Platystictidae	Protostictinae	Drepanosticta	Drepanosticta clavata	1	1	1	1	0	90.81	185	186	58.06
COI6: Flight#6
BOLD:AAA0001	Chordata	Mammalia	Primates	Hominidae	Homininae	Homo	Homo sapiens, Homo neanderthalensis, Homo heidelbergensis, Homo denisova	1022	461	461	1	54.89	98.67	185.99	185.99	45.35
BOLD:AAA2294	Chordata	Mammalia	Artiodactyla	Bovidae	Bovinae	Bos	Bos sp. BXL006, Bos sp. BXL002, Bos javanicus, Bos taurus, Bos indicus, Bos frontalis, Bos primigenius	283	148	148	2	47.7	98.9	174.39	174.42	46.44
BOLD:ACB3766	Chordata	Mammalia	Artiodactyla	Bovidae	Bovinae	Bos	Bos gaurus, Bos frontalis, Bos javanicus	2	1	1	4	50	90.29	175	175	43.43
BOLD:AAR9208	Chordata	Ascidiacea	Phlebobranchia	Cionidae		Ciona	Ciona antarctica	3	3	3	3	0	93.21	177.33	177.33	54.71
BOLD:ACE2625	Chordata	Ascidiacea	Aplousobranchia	Didemnidae		Trididemnum	Trididemnum cereum	1	1	1	5	0	93.49	169	174	55.75
ITS1: Flight #1
TAX:100250	Pinophyta	Pinopsida	Pinales	Pinaceae		Pinus	Pinus strobus	6	6	6	5	0	99.56	305	305	60.66
TAX:254136	Magnoliophyta	Magnoliopsida	Fagales	Fagaceae	Quercoideae	Quercus	Quercus rotundifolia	1	1	1	7	0	95.91	269	272	68.75
TAX:330936	Magnoliophyta	Magnoliopsida	Fagales	Fagaceae	Quercoideae	Quercus	Quercus robur	1	1	1	7	0	95.96	272	273	68.5
TAX:179529	Pinophyta	Pinopsida	Pinales	Pinaceae		Pinus	Pinus contorta	1	1	1	7	0	99.35	306	306	60.46
ITS2: Flight #2
TAX:254136	Magnoliophyta	Magnoliopsida	Fagales	Fagaceae	Quercoideae	Quercus	Quercus rotundifolia	8	6	6	3	25	96.05	269	271.88	68.37
ITS3: Flight #3
TAX:254136	Magnoliophyta	Magnoliopsida	Fagales	Fagaceae	Quercoideae	Quercus	Quercus rotundifolia	2261	530	530	2	76.56	96.02	268.97	271.95	68.42
TAX:121128	Magnoliophyta	Liliopsida	Poales	Poaceae	Pooideae	Agrostis	Agrostis oregonensis	455	159	159	5	65.05	98.87	278.98	278.98	67.35
TAX:502134	Magnoliophyta	Magnoliopsida	Fagales	Fagaceae	Quercoideae	Quercus	Quercus prinoides	76	34	34	6	55.26	95.57	271.54	271.53	68.38
TAX:120921	Magnoliophyta	Liliopsida	Poales	Poaceae	Pooideae	Agrostis	Agrostis scabra	40	28	28	7	30	93.49	277.98	278.9	68.38
TAX:330936	Magnoliophyta	Magnoliopsida	Fagales	Fagaceae	Quercoideae	Quercus	Quercus robur	24	13	13	8	45.83	95.67	272.08	272.63	68.41
TAX:254127	Magnoliophyta	Magnoliopsida	Fagales	Fagaceae	Quercoideae	Quercus	Quercus petraea	22	13	13	9	40.91	96.71	274	272.05	67.67
TAX:208015	Pinophyta	Pinopsida	Pinales	Pinaceae		Pinus	Pinus attenuata	11	5	5	11	54.55	98.9	306	306	61.47
TAX:629759	Magnoliophyta	Magnoliopsida	Fagales	Fagaceae	Quercoideae	Quercus	Quercus robur subsp. robur	11	5	5	11	54.55	91.49	206.27	273	66.43
TAX:121764	Magnoliophyta	Liliopsida	Poales	Poaceae	Pooideae	Festuca	Festuca arundinacea	6	2	2	13	66.67	90.89	278	279	65.71
TAX:672689	Magnoliophyta	Magnoliopsida	Fagales	Fagaceae	Quercoideae	Quercus	Quercus engelmannii	4	3	3	14	25	96.14	272	272	68.2
TAX:288895	Magnoliophyta	Liliopsida	Poales	Juncaceae		Juncus	Juncus maritimus	3	3	3	15	0	99.28	279	279	67.03
TAX:629753	Magnoliophyta	Magnoliopsida	Fagales	Fagaceae	Quercoideae	Quercus	Quercus petraea subsp. petraea	2	1	1	16	50	91.3	207	272	66.91
TAX:288564	Magnoliophyta	Liliopsida	Poales	Poaceae	Pooideae	Agrostis	Agrostis canina	1	1	1	17	0	96.42	279	279	67.38
TAX:434510	Magnoliophyta	Liliopsida	Poales	Poaceae	Pooideae	Agrostis	Agrostis pallens	1	1	1	17	0	99.28	279	279	67.03
TAX:295096	Magnoliophyta	Liliopsida	Poales	Poaceae	Pooideae	Lachnagrostis	Lachnagrostis leptostachys	1	1	1	17	0	93.88	278	279	65.23
ITS4: Flight #4
TAX:254136	Magnoliophyta	Magnoliopsida	Fagales	Fagaceae	Quercoideae	Quercus	Quercus rotundifolia	523	145	145	3	72.28	96.07	268.97	271.95	68.38
TAX:330936	Magnoliophyta	Magnoliopsida	Fagales	Fagaceae	Quercoideae	Quercus	Quercus robur	8	5	5	5	37.5	95.87	272.25	272.5	68.39
TAX:502134	Magnoliophyta	Magnoliopsida	Fagales	Fagaceae	Quercoideae	Quercus	Quercus prinoides	5	4	4	6	20	95.58	271.4	271.6	68.26
TAX:121128	Magnoliophyta	Liliopsida	Poales	Poaceae	Pooideae	Agrostis	Agrostis oregonensis	1	1	1	7	0	99.28	279	279	67.38
TAX:672689	Magnoliophyta	Magnoliopsida	Fagales	Fagaceae	Quercoideae	Quercus	Quercus engelmannii	1	1	1	7	0	96.32	272	272	68.01
ITS5: Flight #5
TAX:288906	Magnoliophyta	Magnoliopsida	Lamiales	Lamiaceae	Lamioideae	Lamium	Lamium hybridum	428	174	174	3	59.35	99.76	306.96	306.97	47.98
TAX:254136	Magnoliophyta	Magnoliopsida	Fagales	Fagaceae	Quercoideae	Quercus	Quercus rotundifolia	2	2	2	5	0	96.1	269	272	68.57
TAX:416795	Magnoliophyta	Liliopsida	Asparagales	Alliaceae		Allium	Allium sativum	1	1	1	6	0	99.35	307	307	48.21
ITS6: Flight #6
TAX:288906	Magnoliophyta	Magnoliopsida	Lamiales	Lamiaceae	Lamioideae	Lamium	Lamium hybridum	5543	1305	1305	2	76.46	99.74	306.98	306.98	47.98
TAX:416795	Magnoliophyta	Liliopsida	Asparagales	Alliaceae		Allium	Allium sativum	29	25	25	4	13.79	99.35	306.79	306.79	48.11
TAX:254136	Magnoliophyta	Magnoliopsida	Fagales	Fagaceae	Quercoideae	Quercus	Quercus rotundifolia	1	1	1	5	0	96.28	269	272	68.38
Pooled Negative Control: All flights-equipment-molecular-sequencing negative controls (COI and ITS)
TAX:125051	Magnoliophyta	Magnoliopsida	Brassicales	Brassicaceae		Arabidopsis	Arabidopsis thaliana	169	88	88	1	47.93	99.6	288.95	288.95	57.44
TAX:148750	Magnoliophyta	Magnoliopsida	Lamiales	Acanthaceae		Justicia		70	43	43	2	38.57	92.76	254.93	254.93	51.59
TAX:176192	Bryophyta							3	3	3	3	0	91.09	254.33	254.33	52.03
TAX:288801	Magnoliophyta	Liliopsida	Poales	Poaceae	Pooideae	Festuca	Festuca pratensis	2	2	2	4	0	99.05	314.5	314.5	65.82
TAX:125834	Magnoliophyta	Magnoliopsida	Fagales	Fagaceae	Quercoideae	Quercus	Quercus palustris	2	1	1	4	50	99.68	310	310	66.45
Legend:
† Values for this quantity are counts.
*Values are counts grouped by taxonomy, then ranked.
No Icon: Values for this quantity are means.

## Sheet: S1.Table4
	S2. Table 4. OTU heatmap based on presence (orange cells) or absence (grey cells) of bacteria at the indicated flight, date, and altitude and assembled from LotuS2 using the SILVA database.
	**Headers under "Taxonomy" in grey italic text indicate organellar signals, non-bacteria reads, or bacterial reads identified in the pooled negative control and were not included in downstream analyses for clarity.
	Flight 1	Flight 2	Flight 3	Flight 4	Flight 5	Flight 6
	2022-05-09	2022-05-09	2022-05-09	2022-06-04	2022-06-04	2022-06-04
	300 m	1200 m	2500 m	300 m	1200 m	2500 m	SILVA Taxonomy
OTU1							Bacteria;Actinobacteriota;Actinobacteria
OTU2							Bacteria;Actinobacteriota;Actinobacteria;Actinomycetales;Actinomycetaceae;Actinomyces
OTU3							Bacteria;Actinobacteriota;Actinobacteria;Kineosporiales;Kineosporiaceae;Kineosporia;uncultured Kineosporiaceae bacterium
OTU4							Bacteria;Actinobacteriota;Actinobacteria;Micrococcales
OTU5							Bacteria;Actinobacteriota;Actinobacteria;Micrococcales;Brevibacteriaceae;Brevibacterium;Brevibacterium oceani
OTU6							Bacteria;Actinobacteriota;Actinobacteria;Micrococcales;Intrasporangiaceae
OTU7							Bacteria;Actinobacteriota;Actinobacteria;Pseudonocardiales;Pseudonocardiaceae;Pseudonocardia;Pseudonocardia spinosispora
OTU8							Bacteria;Actinobacteriota;Actinobacteria;Streptosporangiales;Nocardiopsaceae;Nocardiopsis
OTU9							Bacteria;Bacteroidota;Bacteroidia
OTU10							Bacteria;Bacteroidota;Bacteroidia;Bacteroidales
OTU11							Bacteria;Bacteroidota;Bacteroidia;Bacteroidales;Rikenellaceae;Alistipes
OTU12							Bacteria;Bacteroidota;Bacteroidia;Chitinophagales;Chitinophagaceae;Taibaiella
OTU13							Bacteria;Bacteroidota;Bacteroidia;Cytophagales;Hymenobacteraceae;Hymenobacter
OTU14							Bacteria;Cyanobacteria;Cyanobacteria
OTU15							**Bacteria;Cyanobacteria;Cyanobacteria;Chloroplast
OTU16							**Bacteria;Cyanobacteria;Cyanobacteria;Chloroplast;Pinus koraiensis
OTU17							Bacteria;Cyanobacteria;Cyanobacteria;Cyanobacteriales;Chroococcidiopsaceae;Chroococcidiopsis PCC 7203;Chroococcidiopsis sp.
OTU18							Bacteria;Cyanobacteria;Cyanobacteria;Cyanobacteriales;Nostocaceae
OTU19							Bacteria;Cyanobacteria;Sericytochromatia
OTU20							Bacteria;Deinococcota;Deinococci;Deinococcales;Deinococcaceae;Deinococcus
OTU21							Bacteria;Firmicutes;Bacilli
OTU22							Bacteria;Firmicutes;Bacilli;Bacillales;Bacillaceae
OTU23							Bacteria;Firmicutes;Bacilli;Bacillales;Bacillaceae;Pseudogracilibacillus
OTU24							Bacteria;Firmicutes;Bacilli;Lactobacillales;Lactobacillaceae;Ligilactobacillus;Lactobacillus salivarius
OTU25							Bacteria;Firmicutes;Bacilli;Lactobacillales;Streptococcaceae;Streptococcus
OTU26							Bacteria;Firmicutes;Clostridia;Clostridia UCG-014
OTU27							Bacteria;Firmicutes;Clostridia;Clostridia vadinBB60 group;uncultured Clostridia bacterium
OTU28							Bacteria;Firmicutes;Clostridia;Lachnospirales;Lachnospiraceae
OTU29							Bacteria;Firmicutes;Clostridia;Lachnospirales;Lachnospiraceae;Lachnoclostridium;Mordavella sp.
OTU30							Bacteria;Firmicutes;Clostridia;Lachnospirales;Lachnospiraceae;[Ruminococcus] torques group
OTU31							Bacteria;Firmicutes;Clostridia;Oscillospirales;Oscillospiraceae;Oscillibacter
OTU32							Bacteria;Firmicutes;Clostridia;Peptostreptococcales-Tissierellales;Family XI;Fenollaria
OTU33							Bacteria;Proteobacteria
OTU34							Bacteria;Proteobacteria;Alphaproteobacteria;Acetobacterales;Acetobacteraceae;Craurococcus-Caldovatus
OTU35							Bacteria;Proteobacteria;Alphaproteobacteria;Caulobacterales;Caulobacteraceae;Phenylobacterium;metagenome
OTU36							Bacteria;Proteobacteria;Alphaproteobacteria;Rhizobiales
OTU37							Bacteria;Proteobacteria;Alphaproteobacteria;Rhizobiales;Beijerinckiaceae;Methylobacterium-Methylorubrum
OTU38							Bacteria;Proteobacteria;Alphaproteobacteria;Rhizobiales;Rhizobiaceae
OTU39							Bacteria;Proteobacteria;Alphaproteobacteria;Rhizobiales;Rhizobiaceae;Shinella
OTU40							Bacteria;Proteobacteria;Alphaproteobacteria;Rhizobiales;Xanthobacteraceae
OTU41							Bacteria;Proteobacteria;Alphaproteobacteria;Rhizobiales;Xanthobacteraceae;Bradyrhizobium
OTU42							Bacteria;Proteobacteria;Alphaproteobacteria;Rhodobacterales;Rhodobacteraceae;Rubellimicrobium
OTU43							**Bacteria;Proteobacteria;Alphaproteobacteria;Rickettsiales;Mitochondria
OTU44							Bacteria;Proteobacteria;Alphaproteobacteria;Sphingomonadales;Sphingomonadaceae;Sphingobium
OTU45							Bacteria;Proteobacteria;Gammaproteobacteria;Burkholderiales;Alcaligenaceae;Achromobacter;Achromobacter xylosoxidans
OTU46							Bacteria;Proteobacteria;Gammaproteobacteria;Burkholderiales;Burkholderiaceae;Cupriavidus
OTU47							Bacteria;Proteobacteria;Gammaproteobacteria;Burkholderiales;Comamonadaceae;Pelomonas
OTU48							Bacteria;Proteobacteria;Gammaproteobacteria;Burkholderiales;Oxalobacteraceae
OTU49							**Bacteria;Proteobacteria;Gammaproteobacteria;Enterobacterales;Enterobacteriaceae;Escherichia-Shigella;Escherichia coli
OTU50							Bacteria;Proteobacteria;Gammaproteobacteria;Enterobacterales;Pasteurellaceae;Haemophilus
OTU51							Bacteria;Proteobacteria;Gammaproteobacteria;Pseudomonadales;Moraxellaceae;Acinetobacter;Acinetobacter baumannii
OTU52							Bacteria;Proteobacteria;Gammaproteobacteria;Pseudomonadales;Moraxellaceae;Enhydrobacter
OTU53							Bacteria;Proteobacteria;Gammaproteobacteria;Pseudomonadales;Pseudomonadaceae;Pseudomonas
OTU54							Bacteria;Verrucomicrobiota;Verrucomicrobiae;Chthoniobacterales;Chthoniobacteraceae;Chthoniobacter

## Sheet: S1.Table5
	S2. Table 5. OTU heatmap based on presence (orange cells) or absence (grey cells) of plants at the indicated flight, date, and altitude and assembled from mBRAVE and corroborated by LotuS2 using the PlantITS database. Plant taxonomy to species barcode identification number (BIN) or closest possible level in BOLD.
	**Headers under "BOLD Taxonomy" in grey italic text indicate fungal reads/reads identified in the pooled negative control and were not included in downstream analyses for clarity.
	Flight 1	Flight 2	Flight 3	Flight 4	Flight 5	Flight 6
	2022-05-09	2022-05-09	2022-05-09	2022-06-04	2022-06-04	2022-06-04
	300 m	1200 m	2500 m	300 m	1200 m	2500 m	BOLD Taxonomy
OTU1							Plantae;Pinophyta;Pinopsida;Pinales;Pinaceae;Pinus;Pinus strobus
OTU2							Plantae;Magnoliophyta;Magnoliopsida;Fagales;Fagaceae;Quercus;Quercus rotundifolia
OTU3							Plantae;Magnoliophyta;Magnoliopsida;Fagales;Fagaceae;Quercus;Quercus robur
OTU4							Plantae;Pinophyta;Pinopsida;Pinales;Pinaceae;Pinus;Pinus contorta
OTU5							Plantae;Magnoliophyta;Liliopsida;Poales;Poaceae;Agrostis;Agrostis oregonensis
OTU6							Plantae;Magnoliophyta;Magnoliopsida;Fagales;Fagaceae;Quercus;Quercus prinoides
OTU7							Plantae;Magnoliophyta;Liliopsida;Poales;Poaceae;Agrostis;Agrostis scabra
OTU8							Plantae;Magnoliophyta;Magnoliopsida;Fagales;Fagaceae;Quercus;Quercus petraea
OTU9							Plantae;Pinophyta;Pinopsida;Pinales;Pinaceae;Pinus;Pinus attenuata
OTU10							Plantae;Magnoliophyta;Magnoliopsida;Fagales;Fagaceae;Quercus;Quercus robur subsp. robur
OTU11							Plantae;Magnoliophyta;Liliopsida;Poales;Poaceae;Festuca;Festuca arundinacea
OTU12							Plantae;Magnoliophyta;Magnoliopsida;Fagales;Fagaceae;Quercus;Quercus engelmannii
OTU13							Plantae;Magnoliophyta;Liliopsida;Poales;Juncaceae;Juncus;Juncus maritimus
OTU14							Plantae;Magnoliophyta;Magnoliopsida;Fagales;Fagaceae;Quercus;Quercus petraea subsp. petraea
OTU15							Plantae;Magnoliophyta;Liliopsida;Poales;Poaceae;Agrostis;Agrostis canina
OTU16							Plantae;Magnoliophyta;Liliopsida;Poales;Poaceae;Agrostis;Agrostis pallens
OTU17							Plantae;Magnoliophyta;Liliopsida;Poales;Poaceae;Lachnagrostis;Lachnagrostis leptostachys
OTU18							Plantae;Magnoliophyta;Magnoliopsida;Lamiales;Lamiaceae;Lamium;Lamium hybridum
OTU19							Plantae;Magnoliophyta;Liliopsida;Asparagales;Alliaceae;Allium;Allium sativum
OTU20							**Fungi;Ascomycota;Dothideomycetes;Pleosporales;Didymellaceae;Neoascochyta;Neoascochyta desmazieri
Orange coloured cells indicate detection of OTU by HTAS.

## Sheet: S2.Table6
	S2. Table 6. OTU heatmap based on presence (orange cells) or absence (grey cells) of Vertebrate DNA at the indicated flight, date, and altitude and assembled from mBRAVE and corroborated by DADA2 pipeline in LotuS2. BOLD database taxonomy for vertebrates reflects species barcode identification number (BIN) or closest possible level.
	Flight 1	Flight 2	Flight 3	Flight 4	Flight 5	Flight 6
	2022-05-09	2022-05-09	2022-05-09	2022-06-04	2022-06-04	2022-06-04
	300 m	1200 m	2500 m	300 m	1200 m	2500 m	BOLD Taxonomy
OTU1							Animalia;Chordata;Mammalia;Artiodactyla;Bovidae;Bos;Bos javanicus, Bos taurus, Bos indicus, Bos frontalis, Bos primigenius
OTU2							Animalia;Chordata;Mammalia;Artiodactyla;Bovidae;Bos, Bubalus;Bos gaurus, Bos frontalis, Bos javanicus, Bos taurus, Bubalus bubalis, Bubalus quarlesi, Bubalus arnee
OTU3							Animalia;Chordata;Mammalia;Primates;Hominidae;Homo;Homo sapiens
OTU4							Animalia;Chordata;Aves;Galliformes;Phasianidae;Gallus;Gallus varius, Gallus gallus, Gallus sonneratii
