# Supplementary material for: Aircraft surveys for air eDNA: probing biodiversity in the sky
Source: PeerJ. 2023 Apr 14;11:e15171. doi: 10.7717/peerj.15171 (PMC10108859; doi:10.7717/peerj.15171)
Supplement: Supplemental Information 2 — All non-significant pairwise Wilcoxon and Kruskal Wallis comparisons of altitudes, date, and wind strength. Where applicable, the test statistic, degrees of freedom, and P-values are reported for bacteria (16S), plant (ITS), and vertebrate (COI) OTUs separated by tabbed sheets. [file peerj-11-15171-s002.xlsx]

## Sheet: WilcoxonBacteriaAltitude
Pairwise Wilcoxon results comparing altitudes (heights flown), including where applicable the test statistic, degrees of freedom, P-values for bacteria (16S) OTUs. All statistically non-significant.
group1	group2	p	p.adj	p.signif	method	tax_name
300m	1200m	0.333333	1	ns	Wilcoxon	OTU1
300m	2500m	1	1	ns	Wilcoxon	OTU1
1200m	2500m	1	1	ns	Wilcoxon	OTU1
300m	1200m	1	1	ns	Wilcoxon	OTU2
300m	2500m	1	1	ns	Wilcoxon	OTU2
1200m	2500m	1	1	ns	Wilcoxon	OTU2
300m	1200m	1	1	ns	Wilcoxon	OTU3
300m	2500m	0.666667	1	ns	Wilcoxon	OTU3
1200m	2500m	0.666667	1	ns	Wilcoxon	OTU3
300m	1200m	0.666667	1	ns	Wilcoxon	OTU4
300m	2500m	0.666667	1	ns	Wilcoxon	OTU4
1200m	2500m	1	1	ns	Wilcoxon	OTU4
300m	1200m	1	1	ns	Wilcoxon	OTU5
300m	2500m	0.333333	1	ns	Wilcoxon	OTU5
1200m	2500m	1	1	ns	Wilcoxon	OTU5
300m	1200m	0.666667	1	ns	Wilcoxon	OTU6
300m	2500m	0.220671	0.66	ns	Wilcoxon	OTU6
1200m	2500m	0.617075	1	ns	Wilcoxon	OTU6
300m	1200m	0.617075	1	ns	Wilcoxon	OTU7
1200m	2500m	0.617075	1	ns	Wilcoxon	OTU7
300m	1200m	0.617075	1	ns	Wilcoxon	OTU8
300m	2500m	1	1	ns	Wilcoxon	OTU8
1200m	2500m	0.617075	1	ns	Wilcoxon	OTU8
300m	1200m	0.617075	1	ns	Wilcoxon	OTU9
1200m	2500m	0.617075	1	ns	Wilcoxon	OTU9
300m	1200m	0.617075	1	ns	Wilcoxon	OTU10
300m	2500m	0.617075	1	ns	Wilcoxon	OTU10
300m	1200m	0.617075	1	ns	Wilcoxon	OTU11
300m	2500m	0.666667	1	ns	Wilcoxon	OTU11
1200m	2500m	0.220671	0.66	ns	Wilcoxon	OTU11
300m	1200m	0.617075	1	ns	Wilcoxon	OTU12
300m	2500m	1	1	ns	Wilcoxon	OTU12
1200m	2500m	0.617075	1	ns	Wilcoxon	OTU12
300m	2500m	0.617075	1	ns	Wilcoxon	OTU13
1200m	2500m	0.617075	1	ns	Wilcoxon	OTU13
300m	1200m	1	1	ns	Wilcoxon	OTU14
300m	2500m	1	1	ns	Wilcoxon	OTU14
1200m	2500m	1	1	ns	Wilcoxon	OTU14
300m	1200m	1	1	ns	Wilcoxon	OTU15
300m	2500m	1	1	ns	Wilcoxon	OTU15
1200m	2500m	1	1	ns	Wilcoxon	OTU15
300m	1200m	0.666667	1	ns	Wilcoxon	OTU16
300m	2500m	0.333333	1	ns	Wilcoxon	OTU16
1200m	2500m	0.333333	1	ns	Wilcoxon	OTU16
300m	1200m	1	1	ns	Wilcoxon	OTU17
300m	2500m	1	1	ns	Wilcoxon	OTU17
1200m	2500m	1	1	ns	Wilcoxon	OTU17
300m	1200m	0.333333	1	ns	Wilcoxon	OTU18
300m	2500m	0.333333	1	ns	Wilcoxon	OTU18
1200m	2500m	1	1	ns	Wilcoxon	OTU18
300m	1200m	0.617075	1	ns	Wilcoxon	OTU19
300m	2500m	1	1	ns	Wilcoxon	OTU19
1200m	2500m	0.617075	1	ns	Wilcoxon	OTU19
300m	1200m	0.617075	1	ns	Wilcoxon	OTU20
300m	2500m	0.617075	1	ns	Wilcoxon	OTU20
1200m	2500m	1	1	ns	Wilcoxon	OTU20
300m	1200m	1	1	ns	Wilcoxon	OTU21
300m	2500m	0.617075	1	ns	Wilcoxon	OTU21
1200m	2500m	0.617075	1	ns	Wilcoxon	OTU21
300m	2500m	0.617075	1	ns	Wilcoxon	OTU22
1200m	2500m	0.617075	1	ns	Wilcoxon	OTU22
300m	1200m	0.617075	1	ns	Wilcoxon	OTU23
300m	2500m	1	1	ns	Wilcoxon	OTU23
1200m	2500m	0.617075	1	ns	Wilcoxon	OTU23
300m	1200m	0.220671	0.44	ns	Wilcoxon	OTU24
1200m	2500m	0.220671	0.44	ns	Wilcoxon	OTU24
300m	1200m	0.666667	1	ns	Wilcoxon	OTU25
300m	2500m	1	1	ns	Wilcoxon	OTU25
1200m	2500m	0.666667	1	ns	Wilcoxon	OTU25
300m	1200m	0.617075	1	ns	Wilcoxon	OTU26
300m	2500m	0.617075	1	ns	Wilcoxon	OTU26
300m	1200m	0.617075	1	ns	Wilcoxon	OTU27
1200m	2500m	0.617075	1	ns	Wilcoxon	OTU27
300m	1200m	0.617075	1	ns	Wilcoxon	OTU28
300m	2500m	0.617075	1	ns	Wilcoxon	OTU28
1200m	2500m	1	1	ns	Wilcoxon	OTU28
300m	1200m	1	1	ns	Wilcoxon	OTU29
300m	2500m	1	1	ns	Wilcoxon	OTU29
1200m	2500m	1	1	ns	Wilcoxon	OTU29
300m	1200m	0.617075	1	ns	Wilcoxon	OTU30
300m	2500m	0.617075	1	ns	Wilcoxon	OTU30
1200m	2500m	1	1	ns	Wilcoxon	OTU30
300m	1200m	0.220671	0.44	ns	Wilcoxon	OTU31
300m	2500m	0.220671	0.44	ns	Wilcoxon	OTU31
300m	1200m	0.617075	1	ns	Wilcoxon	OTU32
300m	2500m	1	1	ns	Wilcoxon	OTU32
1200m	2500m	0.617075	1	ns	Wilcoxon	OTU32
300m	1200m	1	1	ns	Wilcoxon	OTU33
300m	2500m	0.333333	1	ns	Wilcoxon	OTU33
1200m	2500m	0.666667	1	ns	Wilcoxon	OTU33
300m	1200m	0.617075	1	ns	Wilcoxon	OTU34
1200m	2500m	0.617075	1	ns	Wilcoxon	OTU34
300m	1200m	0.617075	1	ns	Wilcoxon	OTU35
300m	2500m	0.617075	1	ns	Wilcoxon	OTU35
1200m	2500m	1	1	ns	Wilcoxon	OTU35
300m	1200m	1	1	ns	Wilcoxon	OTU36
300m	2500m	1	1	ns	Wilcoxon	OTU36
1200m	2500m	0.333333	1	ns	Wilcoxon	OTU36
300m	1200m	0.666667	1	ns	Wilcoxon	OTU37
300m	2500m	0.666667	1	ns	Wilcoxon	OTU37
1200m	2500m	0.333333	1	ns	Wilcoxon	OTU37
300m	1200m	0.666667	1	ns	Wilcoxon	OTU38
300m	2500m	1	1	ns	Wilcoxon	OTU38
1200m	2500m	1	1	ns	Wilcoxon	OTU38
300m	1200m	0.617075	1	ns	Wilcoxon	OTU39
300m	2500m	1	1	ns	Wilcoxon	OTU39
1200m	2500m	0.617075	1	ns	Wilcoxon	OTU39
300m	1200m	1	1	ns	Wilcoxon	OTU40
300m	2500m	1	1	ns	Wilcoxon	OTU40
1200m	2500m	1	1	ns	Wilcoxon	OTU40
300m	1200m	1	1	ns	Wilcoxon	OTU41
300m	2500m	1	1	ns	Wilcoxon	OTU41
1200m	2500m	1	1	ns	Wilcoxon	OTU41
300m	1200m	0.617075	1	ns	Wilcoxon	OTU42
300m	2500m	0.617075	1	ns	Wilcoxon	OTU42
300m	1200m	0.333333	1	ns	Wilcoxon	OTU44
300m	2500m	0.617075	1	ns	Wilcoxon	OTU44
1200m	2500m	0.220671	0.66	ns	Wilcoxon	OTU44
300m	1200m	0.333333	1	ns	Wilcoxon	OTU45
300m	2500m	0.333333	1	ns	Wilcoxon	OTU45
1200m	2500m	1	1	ns	Wilcoxon	OTU45
300m	1200m	0.666667	1	ns	Wilcoxon	OTU46
300m	2500m	1	1	ns	Wilcoxon	OTU46
1200m	2500m	1	1	ns	Wilcoxon	OTU46
300m	1200m	0.333333	1	ns	Wilcoxon	OTU47
300m	2500m	0.333333	1	ns	Wilcoxon	OTU47
1200m	2500m	1	1	ns	Wilcoxon	OTU47
300m	1200m	0.617075	1	ns	Wilcoxon	OTU48
1200m	2500m	0.617075	1	ns	Wilcoxon	OTU48
300m	1200m	0.617075	1	ns	Wilcoxon	OTU50
1200m	2500m	0.617075	1	ns	Wilcoxon	OTU50
300m	1200m	0.617075	1	ns	Wilcoxon	OTU51
300m	2500m	1	1	ns	Wilcoxon	OTU51
1200m	2500m	0.617075	1	ns	Wilcoxon	OTU51
300m	1200m	0.617075	1	ns	Wilcoxon	OTU52
1200m	2500m	0.617075	1	ns	Wilcoxon	OTU52
300m	1200m	0.666667	1	ns	Wilcoxon	OTU53
300m	2500m	1	1	ns	Wilcoxon	OTU53
1200m	2500m	1	1	ns	Wilcoxon	OTU53
300m	1200m	0.617075	1	ns	Wilcoxon	OTU54
300m	2500m	0.617075	1	ns	Wilcoxon	OTU54
1200m	2500m	1	1	ns	Wilcoxon	OTU54

## Sheet: WilcoxonBacteriaDate
Pairwise Wilcoxon results comparing date of flights, including where applicable the test statistic, degrees of freedom, P-values for bacteria (16S) OTUs. All statistically non-significant.
group1	group2	p	p.adj	p.signif	method	tax_name
2023-05-09	2023-06-04	0.4	0.4	ns	Wilcoxon	OTU1
2023-05-09	2023-06-04	1	1	ns	Wilcoxon	OTU2
2023-05-09	2023-06-04	0.0765225	0.077	ns	Wilcoxon	OTU3
2023-05-09	2023-06-04	0.1	0.1	ns	Wilcoxon	OTU4
2023-05-09	2023-06-04	0.506555	0.51	ns	Wilcoxon	OTU5
2023-05-09	2023-06-04	1	1	ns	Wilcoxon	OTU6
2023-05-09	2023-06-04	0.504985	0.5	ns	Wilcoxon	OTU7
2023-05-09	2023-06-04	1	1	ns	Wilcoxon	OTU8
2023-05-09	2023-06-04	0.504985	0.5	ns	Wilcoxon	OTU9
2023-05-09	2023-06-04	0.504985	0.5	ns	Wilcoxon	OTU10
2023-05-09	2023-06-04	0.353679	0.35	ns	Wilcoxon	OTU11
2023-05-09	2023-06-04	1	1	ns	Wilcoxon	OTU12
2023-05-09	2023-06-04	0.504985	0.5	ns	Wilcoxon	OTU13
2023-05-09	2023-06-04	0.642835	0.64	ns	Wilcoxon	OTU14
2023-05-09	2023-06-04	0.353679	0.35	ns	Wilcoxon	OTU15
2023-05-09	2023-06-04	1	1	ns	Wilcoxon	OTU16
2023-05-09	2023-06-04	0.0636026	0.064	ns	Wilcoxon	OTU17
2023-05-09	2023-06-04	0.824778	0.82	ns	Wilcoxon	OTU18
2023-05-09	2023-06-04	1	1	ns	Wilcoxon	OTU19
2023-05-09	2023-06-04	0.196706	0.2	ns	Wilcoxon	OTU20
2023-05-09	2023-06-04	0.196706	0.2	ns	Wilcoxon	OTU21
2023-05-09	2023-06-04	0.504985	0.5	ns	Wilcoxon	OTU22
2023-05-09	2023-06-04	1	1	ns	Wilcoxon	OTU23
2023-05-09	2023-06-04	1	1	ns	Wilcoxon	OTU24
2023-05-09	2023-06-04	0.4	0.4	ns	Wilcoxon	OTU25
2023-05-09	2023-06-04	0.504985	0.5	ns	Wilcoxon	OTU26
2023-05-09	2023-06-04	0.504985	0.5	ns	Wilcoxon	OTU27
2023-05-09	2023-06-04	1	1	ns	Wilcoxon	OTU28
2023-05-09	2023-06-04	0.0636026	0.064	ns	Wilcoxon	OTU29
2023-05-09	2023-06-04	0.196706	0.2	ns	Wilcoxon	OTU30
2023-05-09	2023-06-04	1	1	ns	Wilcoxon	OTU31
2023-05-09	2023-06-04	1	1	ns	Wilcoxon	OTU32
2023-05-09	2023-06-04	1	1	ns	Wilcoxon	OTU33
2023-05-09	2023-06-04	0.504985	0.5	ns	Wilcoxon	OTU34
2023-05-09	2023-06-04	0.196706	0.2	ns	Wilcoxon	OTU35
2023-05-09	2023-06-04	0.506555	0.51	ns	Wilcoxon	OTU36
2023-05-09	2023-06-04	0.7	0.7	ns	Wilcoxon	OTU37
2023-05-09	2023-06-04	0.0765225	0.077	ns	Wilcoxon	OTU38
2023-05-09	2023-06-04	1	1	ns	Wilcoxon	OTU39
2023-05-09	2023-06-04	1	1	ns	Wilcoxon	OTU40
2023-05-09	2023-06-04	0.1	0.1	ns	Wilcoxon	OTU41
2023-05-09	2023-06-04	0.504985	0.5	ns	Wilcoxon	OTU42
2023-05-09	2023-06-04	0.642835	0.64	ns	Wilcoxon	OTU44
2023-05-09	2023-06-04	0.824778	0.82	ns	Wilcoxon	OTU45
2023-05-09	2023-06-04	0.0765225	0.077	ns	Wilcoxon	OTU46
2023-05-09	2023-06-04	1	1	ns	Wilcoxon	OTU47
2023-05-09	2023-06-04	0.504985	0.5	ns	Wilcoxon	OTU48
2023-05-09	2023-06-04	0.504985	0.5	ns	Wilcoxon	OTU50
2023-05-09	2023-06-04	1	1	ns	Wilcoxon	OTU51
2023-05-09	2023-06-04	0.504985	0.5	ns	Wilcoxon	OTU52
2023-05-09	2023-06-04	0.4	0.4	ns	Wilcoxon	OTU53
2023-05-09	2023-06-04	0.196706	0.2	ns	Wilcoxon	OTU54

## Sheet: WilcoxonBacteriaWind
Pairwise Wilcoxon results comparing relative wind strength, including where applicable the test statistic, degrees of freedom, P-values for bacteria (16S) OTUs. All statistically non-significant.
group1	group2	p	p.adj	p.signif	method	tax_name
low	high	1	1	ns	Wilcoxon	OTU1
low	high	0.805733	0.81	ns	Wilcoxon	OTU2
low	high	0.48112	0.48	ns	Wilcoxon	OTU3
low	high	0.266667	0.27	ns	Wilcoxon	OTU4
low	high	0.10021	0.1	ns	Wilcoxon	OTU5
low	high	0.460634	0.46	ns	Wilcoxon	OTU6
low	high	0.723674	0.72	ns	Wilcoxon	OTU7
low	high	0.583882	0.58	ns	Wilcoxon	OTU8
low	high	0.288844	0.29	ns	Wilcoxon	OTU9
low	high	0.288844	0.29	ns	Wilcoxon	OTU10
low	high	1	1	ns	Wilcoxon	OTU11
low	high	0.583882	0.58	ns	Wilcoxon	OTU12
low	high	0.723674	0.72	ns	Wilcoxon	OTU13
low	high	1	1	ns	Wilcoxon	OTU14
low	high	0.805733	0.81	ns	Wilcoxon	OTU15
low	high	0.533333	0.53	ns	Wilcoxon	OTU16
low	high	0.218819	0.22	ns	Wilcoxon	OTU17
low	high	0.240327	0.24	ns	Wilcoxon	OTU18
low	high	0.583882	0.58	ns	Wilcoxon	OTU19
low	high	0.411314	0.41	ns	Wilcoxon	OTU20
low	high	0.0552343	0.055	ns	Wilcoxon	OTU21
low	high	0.723674	0.72	ns	Wilcoxon	OTU22
low	high	0.583882	0.58	ns	Wilcoxon	OTU23
low	high	0.583882	0.58	ns	Wilcoxon	OTU24
low	high	1	1	ns	Wilcoxon	OTU25
low	high	0.288844	0.29	ns	Wilcoxon	OTU26
low	high	0.288844	0.29	ns	Wilcoxon	OTU27
low	high	1	1	ns	Wilcoxon	OTU28
low	high	0.460634	0.46	ns	Wilcoxon	OTU29
low	high	1	1	ns	Wilcoxon	OTU30
low	high	0.583882	0.58	ns	Wilcoxon	OTU31
low	high	0.583882	0.58	ns	Wilcoxon	OTU32
low	high	0.266667	0.27	ns	Wilcoxon	OTU33
low	high	0.723674	0.72	ns	Wilcoxon	OTU34
low	high	1	1	ns	Wilcoxon	OTU35
low	high	0.10021	0.1	ns	Wilcoxon	OTU36
low	high	0.533333	0.53	ns	Wilcoxon	OTU37
low	high	0.347558	0.35	ns	Wilcoxon	OTU38
low	high	1	1	ns	Wilcoxon	OTU39
low	high	0.805733	0.81	ns	Wilcoxon	OTU40
low	high	0.266667	0.27	ns	Wilcoxon	OTU41
low	high	0.723674	0.72	ns	Wilcoxon	OTU42
low	high	0.218819	0.22	ns	Wilcoxon	OTU44
low	high	0.240327	0.24	ns	Wilcoxon	OTU45
low	high	0.347558	0.35	ns	Wilcoxon	OTU46
low	high	0.48112	0.48	ns	Wilcoxon	OTU47
low	high	0.288844	0.29	ns	Wilcoxon	OTU48
low	high	0.288844	0.29	ns	Wilcoxon	OTU50
low	high	1	1	ns	Wilcoxon	OTU51
low	high	0.288844	0.29	ns	Wilcoxon	OTU52
low	high	1	1	ns	Wilcoxon	OTU53
low	high	0.411314	0.41	ns	Wilcoxon	OTU54

## Sheet: WilcoxonPlantAltitude
Pairwise Wilcoxon results comparing altitudes (heights flown), including where applicable the test statistic, degrees of freedom, P-values for plant (ITS) OTUs. All statistically non-significant.
group1	group2	p	p.adj	p.signif	method	tax_name
300m	1200m	0.617075	1	ns	Wilcoxon	OTU1
300m	2500m	0.617075	1	ns	Wilcoxon	OTU1
300m	1200m	1	1	ns	Wilcoxon	OTU2
300m	2500m	0.666667	1	ns	Wilcoxon	OTU2
1200m	2500m	0.666667	1	ns	Wilcoxon	OTU2
300m	1200m	0.220671	0.66	ns	Wilcoxon	OTU3
300m	2500m	0.333333	1	ns	Wilcoxon	OTU3
1200m	2500m	0.617075	1	ns	Wilcoxon	OTU3
300m	1200m	0.617075	1	ns	Wilcoxon	OTU4
300m	2500m	0.617075	1	ns	Wilcoxon	OTU4
300m	1200m	0.617075	1	ns	Wilcoxon	OTU5
300m	2500m	1	1	ns	Wilcoxon	OTU5
1200m	2500m	0.617075	1	ns	Wilcoxon	OTU5
300m	1200m	0.617075	1	ns	Wilcoxon	OTU6
300m	2500m	1	1	ns	Wilcoxon	OTU6
1200m	2500m	0.617075	1	ns	Wilcoxon	OTU6
300m	2500m	0.617075	1	ns	Wilcoxon	OTU7
1200m	2500m	0.617075	1	ns	Wilcoxon	OTU7
300m	2500m	0.617075	1	ns	Wilcoxon	OTU8
1200m	2500m	0.617075	1	ns	Wilcoxon	OTU8
300m	2500m	0.617075	1	ns	Wilcoxon	OTU9
1200m	2500m	0.617075	1	ns	Wilcoxon	OTU9
300m	2500m	0.617075	1	ns	Wilcoxon	OTU10
1200m	2500m	0.617075	1	ns	Wilcoxon	OTU10
300m	2500m	0.617075	1	ns	Wilcoxon	OTU11
1200m	2500m	0.617075	1	ns	Wilcoxon	OTU11
300m	1200m	0.617075	1	ns	Wilcoxon	OTU12
300m	2500m	1	1	ns	Wilcoxon	OTU12
1200m	2500m	0.617075	1	ns	Wilcoxon	OTU12
300m	2500m	0.617075	1	ns	Wilcoxon	OTU13
1200m	2500m	0.617075	1	ns	Wilcoxon	OTU13
300m	2500m	0.617075	1	ns	Wilcoxon	OTU14
1200m	2500m	0.617075	1	ns	Wilcoxon	OTU14
300m	2500m	0.617075	1	ns	Wilcoxon	OTU15
1200m	2500m	0.617075	1	ns	Wilcoxon	OTU15
300m	2500m	0.617075	1	ns	Wilcoxon	OTU16
1200m	2500m	0.617075	1	ns	Wilcoxon	OTU16
300m	2500m	0.617075	1	ns	Wilcoxon	OTU17
1200m	2500m	0.617075	1	ns	Wilcoxon	OTU17
300m	1200m	0.617075	1	ns	Wilcoxon	OTU18
300m	2500m	0.617075	1	ns	Wilcoxon	OTU18
1200m	2500m	1	1	ns	Wilcoxon	OTU18
300m	1200m	0.617075	1	ns	Wilcoxon	OTU19
300m	2500m	0.617075	1	ns	Wilcoxon	OTU19
1200m	2500m	1	1	ns	Wilcoxon	OTU19

## Sheet: WilcoxonITSPlantDate
Pairwise Wilcoxon results comparing date of flights, including where applicable the test statistic, degrees of freedom, P-values for plant (ITS) OTUs. All statistically non-significant.
group1	group2	p	p.adj	p.signif	method	tax_name
2023-05-09	2023-06-04	0.504985	0.5	ns	Wilcoxon	OTU1
2023-05-09	2023-06-04	0.4	0.4	ns	Wilcoxon	OTU2
2023-05-09	2023-06-04	0.642835	0.64	ns	Wilcoxon	OTU3
2023-05-09	2023-06-04	0.504985	0.5	ns	Wilcoxon	OTU4
2023-05-09	2023-06-04	1	1	ns	Wilcoxon	OTU5
2023-05-09	2023-06-04	1	1	ns	Wilcoxon	OTU6
2023-05-09	2023-06-04	0.504985	0.5	ns	Wilcoxon	OTU7
2023-05-09	2023-06-04	0.504985	0.5	ns	Wilcoxon	OTU8
2023-05-09	2023-06-04	0.504985	0.5	ns	Wilcoxon	OTU9
2023-05-09	2023-06-04	0.504985	0.5	ns	Wilcoxon	OTU10
2023-05-09	2023-06-04	0.504985	0.5	ns	Wilcoxon	OTU11
2023-05-09	2023-06-04	1	1	ns	Wilcoxon	OTU12
2023-05-09	2023-06-04	0.504985	0.5	ns	Wilcoxon	OTU13
2023-05-09	2023-06-04	0.504985	0.5	ns	Wilcoxon	OTU14
2023-05-09	2023-06-04	0.504985	0.5	ns	Wilcoxon	OTU15
2023-05-09	2023-06-04	0.504985	0.5	ns	Wilcoxon	OTU16
2023-05-09	2023-06-04	0.504985	0.5	ns	Wilcoxon	OTU17
2023-05-09	2023-06-04	0.196706	0.2	ns	Wilcoxon	OTU18
2023-05-09	2023-06-04	0.196706	0.2	ns	Wilcoxon	OTU19

## Sheet: WilcoxonPlantWind
Pairwise Wilcoxon results comparing relative wind strength, including where applicable the test statistic, degrees of freedom, P-values for plant (ITS) OTUs. All statistically non-significant.
group1	group2	p	p.adj	p.signif	method	tax_name
low	high	0.723674	0.72	ns	Wilcoxon	OTU1
low	high	1	1	ns	Wilcoxon	OTU2
low	high	1	1	ns	Wilcoxon	OTU3
low	high	0.723674	0.72	ns	Wilcoxon	OTU4
low	high	1	1	ns	Wilcoxon	OTU5
low	high	1	1	ns	Wilcoxon	OTU6
low	high	0.723674	0.72	ns	Wilcoxon	OTU7
low	high	0.723674	0.72	ns	Wilcoxon	OTU8
low	high	0.723674	0.72	ns	Wilcoxon	OTU9
low	high	0.723674	0.72	ns	Wilcoxon	OTU10
low	high	0.723674	0.72	ns	Wilcoxon	OTU11
low	high	0.583882	0.58	ns	Wilcoxon	OTU12
low	high	0.723674	0.72	ns	Wilcoxon	OTU13
low	high	0.723674	0.72	ns	Wilcoxon	OTU14
low	high	0.723674	0.72	ns	Wilcoxon	OTU15
low	high	0.723674	0.72	ns	Wilcoxon	OTU16
low	high	0.723674	0.72	ns	Wilcoxon	OTU17
low	high	1	1	ns	Wilcoxon	OTU18
low	high	1	1	ns	Wilcoxon	OTU19

## Sheet: WilcoxonVertebrateAltitude
Pairwise Wilcoxon results comparing altitudes (heights flown), including where applicable the test statistic, degrees of freedom, P-values for vertebrate (COI) OTUs. All statistically non-significant.
group1	group2	p	p.adj	p.signif	method	tax_name
300m	1200m	0.666667	1	ns	Wilcoxon	OTU1
300m	2500m	0.333333	1	ns	Wilcoxon	OTU1
1200m	2500m	0.666667	1	ns	Wilcoxon	OTU1
300m	1200m	0.666667	1	ns	Wilcoxon	OTU2
300m	2500m	0.333333	1	ns	Wilcoxon	OTU2
1200m	2500m	1	1	ns	Wilcoxon	OTU2
300m	1200m	0.666667	1	ns	Wilcoxon	OTU3
300m	2500m	0.333333	1	ns	Wilcoxon	OTU3
1200m	2500m	0.666667	1	ns	Wilcoxon	OTU3
300m	1200m	1	1	ns	Wilcoxon	OTU4
300m	2500m	1	1	ns	Wilcoxon	OTU4
1200m	2500m	1	1	ns	Wilcoxon	OTU4

## Sheet: WilcoxonVertebrateDate
Pairwise Wilcoxon results comparing date of flights, including where applicable the test statistic, degrees of freedom, P-values for vertebrate (COI) OTUs. All statistically non-significant.
group1	group2	p	p.adj	p.signif	method	tax_name
2023-05-09	2023-06-04	0.2	0.2	ns	Wilcoxon	OTU1
2023-05-09	2023-06-04	0.506555	0.51	ns	Wilcoxon	OTU2
2023-05-09	2023-06-04	0.2	0.2	ns	Wilcoxon	OTU3
2023-05-09	2023-06-04	1	1	ns	Wilcoxon	OTU4

## Sheet: WilcoxonVertebrateWind
Pairwise Wilcoxon results comparing relative wind strength, including where applicable the test statistic, degrees of freedom, P-values for vertebrate (COI) OTUs. All statistically non-significant.
group1	group2	p	p.adj	p.signif	method	tax_name
low	high	0.8	0.8	ns	Wilcoxon	OTU1
low	high	0.638592	0.64	ns	Wilcoxon	OTU2
low	high	0.8	0.8	ns	Wilcoxon	OTU3
low	high	0.805733	0.81	ns	Wilcoxon	OTU4

## Sheet: KruskalWallisBacteriaAltitude
Kruskal-Wallis rank sum test results comparing altitudes (heights flown), including where applicable the test statistic, degrees of freedom, P-values for bacteria (16S) OTUs. All statistically non-significant.
chi-squared	degrees.of.freedom	p.value	method	tax_name
1.14286	2	0.564718	Kruskal-Wallis rank sum test	OTU1
0.322581	2	0.851045	Kruskal-Wallis rank sum test	OTU2
0.955882	2	0.620059	Kruskal-Wallis rank sum test	OTU3
0.857143	2	0.651439	Kruskal-Wallis rank sum test	OTU4
1.54412	2	0.462061	Kruskal-Wallis rank sum test	OTU5
2.90323	2	0.234192	Kruskal-Wallis rank sum test	OTU6
2	2	0.367879	Kruskal-Wallis rank sum test	OTU7
1.3	2	0.522046	Kruskal-Wallis rank sum test	OTU8
2	2	0.367879	Kruskal-Wallis rank sum test	OTU9
2	2	0.367879	Kruskal-Wallis rank sum test	OTU10
2.90323	2	0.234192	Kruskal-Wallis rank sum test	OTU11
1.3	2	0.522046	Kruskal-Wallis rank sum test	OTU12
2	2	0.367879	Kruskal-Wallis rank sum test	OTU13
0.322581	2	0.851045	Kruskal-Wallis rank sum test	OTU14
0.322581	2	0.851045	Kruskal-Wallis rank sum test	OTU15
3.71429	2	0.156118	Kruskal-Wallis rank sum test	OTU16
0.322581	2	0.851045	Kruskal-Wallis rank sum test	OTU17
3.60294	2	0.165056	Kruskal-Wallis rank sum test	OTU18
1.3	2	0.522046	Kruskal-Wallis rank sum test	OTU19
1.3	2	0.522046	Kruskal-Wallis rank sum test	OTU20
1.3	2	0.522046	Kruskal-Wallis rank sum test	OTU21
2	2	0.367879	Kruskal-Wallis rank sum test	OTU22
1.3	2	0.522046	Kruskal-Wallis rank sum test	OTU23
4.8	2	0.090718	Kruskal-Wallis rank sum test	OTU24
0.857143	2	0.651439	Kruskal-Wallis rank sum test	OTU25
2	2	0.367879	Kruskal-Wallis rank sum test	OTU26
2	2	0.367879	Kruskal-Wallis rank sum test	OTU27
1.3	2	0.522046	Kruskal-Wallis rank sum test	OTU28
0.322581	2	0.851045	Kruskal-Wallis rank sum test	OTU29
1.3	2	0.522046	Kruskal-Wallis rank sum test	OTU30
4.8	2	0.090718	Kruskal-Wallis rank sum test	OTU31
1.3	2	0.522046	Kruskal-Wallis rank sum test	OTU32
2	2	0.367879	Kruskal-Wallis rank sum test	OTU33
2	2	0.367879	Kruskal-Wallis rank sum test	OTU34
1.3	2	0.522046	Kruskal-Wallis rank sum test	OTU35
1.54412	2	0.462061	Kruskal-Wallis rank sum test	OTU36
2.57143	2	0.276453	Kruskal-Wallis rank sum test	OTU37
0.514706	2	0.773095	Kruskal-Wallis rank sum test	OTU38
1.3	2	0.522046	Kruskal-Wallis rank sum test	OTU39
0.322581	2	0.851045	Kruskal-Wallis rank sum test	OTU40
0	2	1	Kruskal-Wallis rank sum test	OTU41
2	2	0.367879	Kruskal-Wallis rank sum test	OTU42
4.19355	2	0.122852	Kruskal-Wallis rank sum test	OTU44
3.60294	2	0.165056	Kruskal-Wallis rank sum test	OTU45
0.514706	2	0.773095	Kruskal-Wallis rank sum test	OTU46
3.60294	2	0.165056	Kruskal-Wallis rank sum test	OTU47
2	2	0.367879	Kruskal-Wallis rank sum test	OTU48
2	2	0.367879	Kruskal-Wallis rank sum test	OTU50
1.3	2	0.522046	Kruskal-Wallis rank sum test	OTU51
2	2	0.367879	Kruskal-Wallis rank sum test	OTU52
0.285714	2	0.866878	Kruskal-Wallis rank sum test	OTU53
1.3	2	0.522046	Kruskal-Wallis rank sum test	OTU54

[truncated: 8 more sheets: KruskalWallisBacteriaDate, KruskalWallisBacteriaWind, KruskalWallisPlantAltitude, KruskalWallisPlantDate, KruskalWallisPlantWind, KruskalWallisVertebrateAltitude, KruskalWallisVertebrateDate, KruskalWallisVertebrateWind]
